# Supplementary material
Source: publisher figshare collection journal article supplement (https://plos.figshare.com/articles/dataset/_/6157235)
Supplement: Supplementary file [file 1]

S2 Table

| Protein description                           | Gene identification      | UniProt ID | Number peptides <sup>a</sup> | <i>C. difficile</i>    |
|-----------------------------------------------|--------------------------|------------|------------------------------|------------------------|
| <b>Germination</b>                            |                          |            |                              |                        |
| Peptidase M20/M25/M40 family protein          | H477_0435                | T0E6L8     | 8/7                          | -                      |
| Peptidase M20/M25/M40 family protein          | H477_0436                | T0CTM7     | 3/2                          | -                      |
| Putative peptidoglycan binding domain protein | H477_0372                | T0D2M7     | 3/7                          | -                      |
| <b>Pathogenicity</b>                          |                          |            |                              |                        |
| Translation elongation factor Tu              | H477_0026 ( <i>tuf</i> ) | T0D4X3     | 15/23                        | CD0071 ( <i>tuf1</i> ) |
| TCP-1/cpn60 chaperonin family protein         | H477_0241                | T0D415     | 4/4                          | CD0194 ( <i>groL</i> ) |
| Hsp70 family protein                          | H477_2996                | T0CNF5     | 7/5                          | CD2461 ( <i>dnaK</i> ) |
| Phosphopyruvate hydratase                     | H477_4609 ( <i>eno</i> ) | T2REI3     | 1/4                          | CD3170 ( <i>eno</i> )  |
| <b>Spore assembly</b>                         |                          |            |                              |                        |
| Glycosyl hydrolases 18 family protein         | H477_2042                | T0E6S9     | 10/10                        | CD1433 ( <i>cotE</i> ) |
| Manganese containing catalase family protein  | H477_3485                | T0DWI1     | 4/2                          | CD2401 ( <i>cotD</i> ) |
| Manganese containing catalase family protein  | H477_3486                | T0DR76     | 3/4                          | -                      |
| Uncharacterized protein                       | H477_3144                | T0DXD7     | 52/21                        | CD1067 ( <i>cdeC</i> ) |
| <b>Spore resistance</b>                       |                          |            |                              |                        |
| Reverse rubrerythrin-1                        | H477_0313                | T0D302     | 4/4                          | -                      |
| Reverse rubrerythrin-1                        | H477_0314                | T0EAX3     | 4/4                          | -                      |
| Uncharacterized protein                       | H477_2973                | T0DRL7     | 7/12                         | CD1511 ( <i>cotB</i> ) |
| Small, acid-soluble spore protein beta        | H477_4660                | T2RDK8     | 7/16                         | -                      |
| <b>Unknown putative role</b>                  |                          |            |                              |                        |
| Putative amidase domain protein               | H477_1207                | T0E528     | 1/1                          | -                      |
| Uncharacterized protein                       | H477_1422                | T0E0I6     | 16/7                         | -                      |
| Uncharacterized protein                       | H477_1423                | T0CMC7     | 12/5                         | -                      |
| Coat F domain protein                         | H477_1527                | T0E0R1     | 1/1                          | -                      |
| Uncharacterized protein                       | H477_1731                | T0E5Y2     | 1/3                          | -                      |
| Cupin domain protein                          | H477_1872                | T0E1S4     | 1/1                          | -                      |
| Uncharacterized protein                       | H477_1876                | T0E6D8     | 2/3                          | -                      |
| Uncharacterized protein                       | H477_2974                | T0CDB2     | 1/5                          | -                      |
| Uncharacterized protein                       | H477_3325                | T0CLP4     | 6/5                          | -                      |
| Uncharacterized protein                       | H477_3327                | T0DW21     | 9/5                          | -                      |
| Uncharacterized protein                       | H477_3692                | T2RFS0     | 1/4                          | -                      |
| Uncharacterized protein                       | H477_3966                | T2RGS3     | 3/2                          | -                      |
| Uncharacterized protein                       | H477_4099                | T2RG98     | 23/29                        | -                      |
| Uncharacterized protein                       | H477_4384                | T2RFG7     | 3/8                          | -                      |
| Fascin domain protein                         | H477_5266                | T0EB21     | 2/3                          | -                      |
| Uncharacterized protein                       | H477_5615                | T0D6Z2     | 1/1                          | -                      |

| Cytosolic proteins                                                                  |                            |        |     |    |  |
|-------------------------------------------------------------------------------------|----------------------------|--------|-----|----|--|
| 50S ribosomal protein L7/L12                                                        | H477_0034 ( <i>rplL</i> )  | T0CV21 | 4/3 | NA |  |
| Small GTP-binding domain protein                                                    | H477_0047                  | T0ECN6 | 1/2 | NA |  |
| 30S ribosomal protein S8                                                            | H477_0067 ( <i>rpsH</i> )  | T0D495 | 1/3 | NA |  |
| S4 domain protein                                                                   | H477_0085                  | T0E826 | 2/1 | NA |  |
| 50S ribosomal protein L17                                                           | H477_0088 ( <i>rplQ</i> )  | T0D4U1 | 2/2 | NA |  |
| Peptidyl-prolyl cis-trans isomerase                                                 | H477_0324                  | T0EAY0 | 2/2 | NA |  |
| Acyl-CoA dehydrogenase, N-terminal domain protein                                   | H477_0355                  | T0E6E7 | 4/2 | NA |  |
| CO dehydrogenase/acetyl-CoA synthase complex beta subunit                           | H477_0479                  | T0EB97 | 3/1 | NA |  |
| Pyruvate formate lyase family protein                                               | H477_0509                  | T0D3J0 | 3/2 | NA |  |
| Branched-chain-amino-acid aminotransferase                                          | H477_0714 ( <i>ilvE</i> )  | T0CZT3 | 2/1 | NA |  |
| Glycine/sarcosine/betaine reductase complex component C subunit beta domain protein | H477_0807                  | T0E3Z3 | 1/1 | NA |  |
| Acetate kinase (Acetokinase)                                                        | H477_1003 ( <i>ackA</i> )  | T0CRP9 | 1/1 | NA |  |
| Propanediol utilization PduL family protein                                         | H477_1156                  | T0E9N3 | 1/1 | NA |  |
| Pyruvate formate lyase family protein                                               | H477_1816                  | T0E668 | 2/2 | NA |  |
| Peroxiredoxin                                                                       | H477_2044                  | T0CP16 | 9/8 | NA |  |
| Putative membrane protein                                                           | H477_2616                  | T0CFK2 | 2/3 | NA |  |
| Elongation factor Ts                                                                | H477_2726 ( <i>tsf</i> )   | T0CFX2 | 1/2 | NA |  |
| 30S ribosomal protein S2                                                            | H477_2728 ( <i>rpsB</i> )  | T0CQV5 | 3/2 | NA |  |
| M42 glutamyl aminopeptidase family protein                                          | H477_2794                  | T0DZF4 | 1/1 | NA |  |
| Tryptophanase 2                                                                     | H477_3251 ( <i>tnaA2</i> ) | T0CM84 | 3/2 | NA |  |
| ATP synthase subunit beta, sodium ion specific                                      | H477_4865 ( <i>atpD</i> )  | T2RDU1 | 3/6 | NA |  |
| ATP synthase F1, alpha subunit                                                      | H477_4869                  | T2RCL9 | 1/2 | NA |  |
| M42 glutamyl aminopeptidase family protein                                          | H477_4964                  | T2RCT6 | 2/4 | NA |  |

<sup>a</sup> Number of unique peptides in replicate 1/ number of unique peptides in replicate 2.

## S2 Table. Proteins identified by LC MS/MS in the exosporial extracts of *C. sordellii* strain

**ATCC9714.** *C. difficile* exosporial proteins [1] that showed homology to *C. sordellii* proteins are recorded here as gene identifications. Only proteins that were identified with at least one unique peptide in both biological replicates have been included in this table.

## Reference

1. Díaz-González F, Milano M, Olguin-Araneda V, Pizarro-Cerda J, Castro-Córdova P, Tzeng SC, et al. Protein composition of the outermost exosporium-like layer of *Clostridium difficile* 630 spores. Journal of Proteomics. 2015;123:1-13. doi: 10.1016/j.jprot.2015.03.035.
